# Supplementary material
Source: PeerJ journal article supplement (doi:10.7717/peerj-cs.3484)
Supplement: Appendix_abbr_table.docx [file Appendix_abbr_table.docx]

| **Abbreviation** | **Full Form** |
| --- | --- |
| AD | Alzheimer’s Disease |
| AE | Autoencoder |
| AI | Artificial Intelligence |
| ANN | Artificial Neural Network |
| AUC | Area Under the Curve |
| CBMIR | Content-Based Medical Image Retrieval |
| CNN | Convolutional Neural Network |
| COPD | Chronic Obstructive Pulmonary Disease |
| CSF | CerebroSpinal Fluid |
| CT | Computed Tomography |
| CTGAN | Conditional Tabular Generative Adversarial Network |
| CV | Cross-Validation |
| CVD | Cardiovascular Disease |
| DCGAN | Deep Convolutional Generative Adversarial Network |
| DNN | Deep Neural Network |
| DL | Deep Learning |
| DBN | Deep Belief Network |
| ECG | Electrocardiogram |
| EEG | Electroencephalogram |
| EHR | Electronic Health Record |
| ET | Essential Tremor |
| FL | Federated Learning |
| GAN | Generative Adversarial Network |
| GNN | Graph Neural Network |
| IoT | Internet of Things |
| LIME | Local Interpretable Model-Agnostic Explanations |
| LSTM | Long Short-Term Memory |
| MCI | Mild Cognitive Impairment |
| MLP | Multi-Layer Perceptron |
| ML | Machine Learning |
| MRI | Magnetic Resonance Imaging |
| NC | Normal Controls |
| NLP | Natural Language Processing |
| PET | Positron Emission Tomography |
| PD | Parkinson’s Disease |
| PT | Parkinsonian Tremor |
| RF | Random Forest |
| RL | Reinforcement Learning |
| ROC | Receiver Operating Characteristic |
| RNN | Recurrent Neural Network |
| SENN | Self-Explaining Neural Network |
| SHAP | SHapley Additive exPlanations |
| SMOTE | Synthetic Minority Oversampling Technique |
| SVM | Support Vector Machine |
| ViT | Vision Transformer |
| XAI | Explainable Artificial Intelligence |
